# Supplementary material
Source: HighWire-hosted journal article supplement (https://gut.bmj.com/content/70/10/1946)
Supplement: inline-supplementary-material-1 [file inline-supplementary-material-1.pdf]

Jung et al.

## Supplementary material: Methods

### UCSD-NAFLD Cohort's Exclusion Criteria

- i. Clinical or histological evidence of alcoholic liver disease.
  1. Regular and excessive use of alcohol within the 2 years prior to interview defined as alcohol intake greater than 14 drinks per week in a man or greater than 7 drinks per week in a woman. Approximately 10 g of alcohol equals one 'drink' unit. One unit equals 1 ounce of distilled spirits, one 12-oz beer, or one 4-oz glass of wine
- ii. Total parenteral nutrition for more than 1 month within a 6 month period before baseline liver biopsy
- iii. Short bowel syndrome
- iv. History of gastric or jejunoileal bypass preceding the diagnosis of NAFLD. Bariatric surgery performed following enrollment is not exclusionary. Liver biopsies obtained during bariatric surgery cannot be used for enrollment because of the associated surgical or anesthetic acute changes and the weight loss efforts that precede bariatric surgery
- v. History of biliopancreatic diversion
- vi. Evidence of advanced liver disease defined as a Child-Pugh-Turcotte score equal to or greater than 10
- vii. Evidence of chronic hepatitis B as marked by the presence of HBsAg in serum (subjects with isolated antibody to hepatitis B core antigen, anti-HBc total, are not excluded)
- viii. Evidence of chronic hepatitis C as marked by the presence of anti-HCV or HCV RNA in serum
- ix. Low alpha-1-antitrypsin level and ZZ phenotype (both determined at the discretion of the investigator)
- x. Wilson's disease
- xi. Known glycogen storage disease
- xii. Known dysbetalipoproteinemia
- xiii. Known phenotypic hemochromatosis (HII greater than 1.9 or removal of more than 4 g of iron by phlebotomy)
- xiv. Prominent bile duct injury (florid duct lesions or periductal sclerosis) or bile duct paucity
- xv. Chronic cholestasis
- xvi. Vascular lesions (vasculitis, cardiac sclerosis, acute or chronic Budd-Chiari, hepatoportal sclerosis, peliosis)
- xvii. Iron overload greater than 3+
- xviii. Zones of confluent necrosis, infarction, massive or sub-massive, pan-acinar necrosis
- xix. Multiple epithelioid granulomas
- xx. Congenital hepatic fibrosis
- xxi. Polycystic liver disease
- xxii. Other metabolic or congenital liver disease
- xxiii. Evidence of systemic infectious disease
- xxiv. Known HIV positive
- xxv. Disseminated or advanced malignancy
- xxvi. Concomitant severe underlying systemic illness that in the opinion of the investigator would interfere with completion of potential follow-ups
- xxvii. Active drug use or dependence that, in the opinion of the study investigator, would interfere with adherence to study requirements

Jung et al.

- xxviii. Any other condition, which in the opinion of the investigator would impede compliance or hinder completion of study
- xxix. Inability to provide informed consent

### Supplementary material: Results

**Table 1.** Cross-tabulation of the number of patients in UCSD-NAFLD Cohort and Japan-NAFLD Cohort comparing the MEFIB Index, MRE $\geq$ 3.3kPa and FIB-4 $\geq$ 1.6, with liver biopsy.

|                           |           | $\geq$ stage 2 fibrosis* |          | Total |
|---------------------------|-----------|--------------------------|----------|-------|
|                           |           | Positive                 | Negative |       |
| <b>UCSD-NAFLD Cohort</b>  | Positive† | 34                       | 1        | 35    |
|                           | Negative  | 34                       | 169      | 203   |
|                           | Total     | 68                       | 170      | 238   |
| <b>Japan-NAFLD Cohort</b> | Positive† | 81                       | 8        | 89    |
|                           | Negative  | 54                       | 79       | 133   |
|                           | Total     | 135                      | 87       | 222   |

\* NASH CRN histology scoring system was used.

†determined by categorizing a positive response as MRE  $\geq$  3.3kPa and FIB-4  $\geq$  1.6 vs any other combination

**Table 2.** Diagnostic test characteristic of MRE, FIB-4, and MRE+FIB-4 in detecting  $\geq$  stage 2 fibrosis in the Japan-NAFLD Cohort

| Model:                                | Japan-NAFLD Cohort |               |      |      |
|---------------------------------------|--------------------|---------------|------|------|
|                                       | AUROC (95% CI)     | p-value*      | PPV‡ | NPV  |
| MRE $\geq$ 3.0 kPa†                   | 0.81 (0.75-0.86)   | ref           | 82.6 | 83.2 |
| FIB-4 $\geq$ 1.6†                     | 0.73 (0.68-0.79)   | <b>0.0324</b> | 84.6 | 60.2 |
| MRE $\geq$ 3.0 kPa + FIB-4 $\geq$ 1.6 | 0.85 (0.80-0.90)   | <b>0.0042</b> | 89.5 | 60.6 |

Abbreviations: PPV, positive predictive value; NPV, negative predictive value; MRE, magnetic resonance elastography, FIB-4, fibrosis – 4

\*p-value for comparison to MRE alone

†cut-points have been recalculated using the Youden's Index from the Japan-NAFLD Cohort

‡ determined by categorizing a positive response as MRE  $\geq$  3.0kPa and FIB-4  $\geq$  1.6 vs any other combination
